# Supplementary material for: Alternative Transcripts Diversify Genome Function for Phenome Relevance to Health and Diseases
Source: MDPI journal article supplement (doi:10.3390/genes14112051), 2023-11-08
Supplement: s1 [file s1]

**Table S1. Alternative Exon Splicing Isoforms.** A collection of experimentally verified isoforms with isoform designation, relative length, localization, tissue studied, and function where found [37–40,42–44,48,54,102,104,178–185,187–201,203–213,222–223].

| Gene         | Isoform | Length | Localization                       | Tissue     | Effect                                                                                                                                                                                                                                                              |
|--------------|---------|--------|------------------------------------|------------|---------------------------------------------------------------------------------------------------------------------------------------------------------------------------------------------------------------------------------------------------------------------|
| <i>AAMDC</i> | -Q      | Short  | Not found                          | Not found  | No detectable protein, possibly lncRNA                                                                                                                                                                                                                              |
| <i>ATG4</i>  | A       | Long   | Not found                          | Ubiquitous | Contribute to residual priming activity, sufficient to enable lipidation of endogenous GABARAPL1 on autophagic structures. Processes LGG-1 100 fold more efficiently than ATG4B. Prefers GABARAP/GATE family to LC3                                                 |
|              | B       | Long   | Not found                          | Ubiquitous | Required for priming of most LC3 subfamily isoforms (1500 fold more efficiently than any other isoform), efficient delipidation, main human isoform. Depletion shows severe but incomplete defect in processing/autophagy                                           |
|              | C       | Short  | Cytosol/Mitochondria (conditional) | Ubiquitous | Contribute to residual priming activity, sufficient to enable lipidation of endogenous GABARAPL1 on autophagic structures, less activity than ATG4A. Poor primers, efficient at delipidation.                                                                       |
|              | D       | Short  | Cytosol/Mitochondria (conditional) | Ubiquitous | Contribute to residual priming activity, sufficient to enable lipidation of endogenous GABARAPL1 on autophagic structures, less activity than ATG4A. Poor primers, efficient at delipidation. Affinity for damaged mitochondria, overexpression leads to apoptosis. |
| <i>BDNF</i>  | Mature  | Long   | Dendrites and Soma                 | Brain      | Linked to long term potentiation                                                                                                                                                                                                                                    |
|              | ProBDNF | Short  | Soma                               | Brain      | Determine neuronal fate, pathway of further development and differentiation                                                                                                                                                                                         |
| <i>BRD4</i>  | -L      | Long   | Nucleus                            | Breast     | Inhibits tumor progression, limits metastatic potential in certain tissues. Knockdown delays G1 cell cycle progression                                                                                                                                              |
|              | -S(a)   | Short  | Inner face of nuclear membrane     | Breast     | Promotes breast and ovarian cancer growth and metastasis, knockdown leads to S-phase arrest                                                                                                                                                                         |
| <i>CD33</i>  | -Long   | Long   | cell surface                       | Microglia  | Associated with reduced phagocytosis in macrophages,                                                                                                                                                                                                                |

|               |                     |       |                                                                           |             |                                                                                                                                                                                                                                                                     |
|---------------|---------------------|-------|---------------------------------------------------------------------------|-------------|---------------------------------------------------------------------------------------------------------------------------------------------------------------------------------------------------------------------------------------------------------------------|
|               |                     |       |                                                                           |             | causes susceptibility to Alzheimer's disease                                                                                                                                                                                                                        |
|               | -Short              | Short | cytoplasm                                                                 | Microglia   | Associated with reduced long form expression, increased phagocytosis, resistance to Alzheimer's disease                                                                                                                                                             |
| <b>CDC42</b>  | (E6)                | Short | Dendritic Spines                                                          | Brain       | Prenylated and palmitoylated. Plays a role in dendritic spine formation, role in developing neural tube                                                                                                                                                             |
|               | (E7)                | Long  | Axon compartment                                                          | Ubiquitous  | Prenylated. Stimulates axon specification in dose dependent manner, role in developing neural tube                                                                                                                                                                  |
| <b>CEACAM</b> | 1-L                 | Long  | cell-cell contact points                                                  | Liver/Colon | Associated with invasion, metastasis and recurrence in hepatocellular carcinoma, can act as tumor suppressor in other cancers. Promotes invasion and migration in colorectal cancer.                                                                                |
|               | 1-S                 | Short | soluble, scattered over cell surface                                      | Liver/Colon | Short form not associated with vulnerability                                                                                                                                                                                                                        |
| <b>CFLAR</b>  | c-FLIP <sub>L</sub> | Long  | Nucleus(predominately)/cytoplasm/<br>ER/Mitochondria Associated Membranes | Ubiquitous  | Can act in pro or anti-apoptotic manner. High levels correlate low expression of the short form, with resistance to fas-mediated apoptosis and necroptosis. Role in T cell proliferation.                                                                           |
|               | c-FLIP <sub>S</sub> | Short | Cytoplasm                                                                 | Not found   | Short forms act in anti-apoptotic manner.                                                                                                                                                                                                                           |
|               | c-FLIP <sub>R</sub> | Short | Cytoplasm                                                                 | Not found   | Short forms act in anti-apoptotic manner. Titrates away and blocks CASP8                                                                                                                                                                                            |
| <b>IGF-1</b>  | Eb                  | Long  | Nuclear Fraction/ER                                                       | Muscle      | Responsible for satellite cell activation and proliferation, both isoforms protect against age related muscle loss                                                                                                                                                  |
|               | Ea                  | Short | Cytoplasm                                                                 | Muscle      | Sustains hypertrophy and regeneration in senescent skeletal muscle. Activates additional pathways such as AMPK, able to minimize oxidative damage. Promotes satellites cell differentiation and provides most of the mature IGF-1 for stimulating protein synthesis |
| <b>NR3C1</b>  | hGR $\beta$         | Long  | Nucleus/cytoplasm-translocates to nucleus                                 | Ubiquitous  | Natural dominant negative inhibitor of hGR $\alpha$ , can directly induce and repress a large number of genes not controlled by hGR $\alpha$ . Lower expression than alpha isoform except in epithelial and neutrophil cells.                                       |

|              |              |       |                                                     |                                                  |                                                                                                                                                                                                                                                          |
|--------------|--------------|-------|-----------------------------------------------------|--------------------------------------------------|----------------------------------------------------------------------------------------------------------------------------------------------------------------------------------------------------------------------------------------------------------|
|              | hGR $\alpha$ | Long  | Nucleus/cytoplasm-translocates cytoplasm to nucleus | Ubiquitous                                       | Bind glucocorticoids, recruits coregulators to exert transcriptional effects                                                                                                                                                                             |
| <i>NUMA1</i> | -long        | Long  | Spindle/Nucleus                                     | Ubiquitous                                       | Mitotic spindle assembly/maintenance. Structural component of nuclear matrix.                                                                                                                                                                            |
|              | -short       | Short | cytoplasm                                           | Ubiquitous                                       | Inhibit proliferation of HeLa cells, greatly restrain formation of cell colonies. Suppress expression of MYBL2. Greatly decreased expression of short form in gastric cancer tissues.                                                                    |
| <i>OPA1</i>  | -l           | Long  | Membrane anchored                                   | Ubiquitous                                       | Fusion competent for mitochondrial network morphology, not energetics competent, both types of isoform competent at maintaining cristae shape and junctions.<br>Overexpression protects from muscular atrophy, ischemic damage and hepatocyte apoptosis. |
|              | -s           | Short | Mitochondrial intermembrane space                   | Ubiquitous                                       | Efficient at preserving energetics (mitochondrial respiration and RCS organization), not fusion competent for mitochondrial network morphology, both types of isoform competent at maintaining cristae shape and junctions                               |
| <i>PKM</i>   | 1            | N/A   | cytoplasm/nucleus                                   | Brain/Muscle/Heart-somatic tissues               | Used in TCA cycle, glucose metabolism, possible implication of tumor involvement in certain cancers                                                                                                                                                      |
|              | 2            | N/A   | cytoplasm/nucleus                                   | Embryonic, proliferating, and cancer cells       | Glucose metabolism, more favorable to aerobic glycolysis. Promotes Warburg effect                                                                                                                                                                        |
| <i>PRLR</i>  | -Long        | Long  | Not found                                           | Ovary/Uterus/Breast, most other tissues lesser   | Can act as dominant negative to the other isoform and prevent excessive signaling of one isoform. Requires both isoforms for corpus luteum survival.                                                                                                     |
|              | -Shorter     | Short | Not found                                           | Kidney/placenta/pancreas/liver                   | Can act as dominant negative to the other isoform and prevent excessive signaling of one isoform. Requires both isoforms for corpus luteum survival. Operates different signaling pathways than the long isoform in PDAC cells, acts a tumor suppressor. |
| <i>RUNX1</i> | A            | N/A   | Not found                                           | Immature hematopoietic stem and progenitor cells | Overexpression expands functional HSCs in vitro and in vivo, retards hematopoietic differentiation, and enhances engraftment of murine bone marrows cell after transplant.                                                                               |

|              |         |         |                                    |                                   |                                                                                                                                                                                                                                                                    |
|--------------|---------|---------|------------------------------------|-----------------------------------|--------------------------------------------------------------------------------------------------------------------------------------------------------------------------------------------------------------------------------------------------------------------|
|              |         |         |                                    |                                   | Overexpression associated with leukemias                                                                                                                                                                                                                           |
|              | B/C     | N/A     | Not found                          | Not found                         | Promote differentiation and abrogate engraftment of transplanted murine bone marrow cells                                                                                                                                                                          |
| <i>STIM1</i> | L       | Long    | Not found                          | Muscle                            | Allows immediate activation of SOCE, required to trigger repetitive cytosolic Ca <sup>2+</sup> releases. Can permanently cluster.                                                                                                                                  |
|              | S       | Short   | ER (predominately)/Plasma membrane | Ubiquitous                        | ER Ca <sup>2+</sup> sensor controlling SOCE and CRAC channels in non-excitabile cells.                                                                                                                                                                             |
|              | A       | Short   | ER                                 | Astrocytes, heart, kidney, testes | Dominant negative regulator of SOCE and I <sub>crac</sub> , facilitating sequence-specific fast calcium dependent inactivation and destabilizing gating of Orai channels                                                                                           |
|              | B       | Unclear | Presynaptic ER                     | CNS/Cerebellum                    | Increases vesicle release at high demand, alters slow Ca <sup>2+</sup> dependent inactivation of I <sub>crac</sub>                                                                                                                                                 |
| <i>FYN</i>   | B       | N/A     | Not found                          | CNS                               | Less efficient phosphorylation of Sam68 than FYNT-change of SH2 inase linker onto both SH3 and kinase domains. Decoupled from apoptosis regulation in epithelial cells                                                                                             |
|              | T       | N/A     | Not found                          | Hematopoietic                     | Specific regulation of Sam68 dependent BCL-X alternative splicing and cell apoptosis                                                                                                                                                                               |
| <i>FAK</i>   | +6,7    | N/A     | cytoplasm (cytoskeleton)           | CNS (Neuron/glia)                 | Enhanced autophosphorylation, strong intramolecular phosphorylation                                                                                                                                                                                                |
|              | +3      | N/A     | Not found                          | Not found                         | Same low autophosphorylation rate as primary isoform, undergoes intermolecular phosphorylation in intact cells                                                                                                                                                     |
|              | +6,7,28 | N/A     | Not found                          | CNS                               | Enhanced autophosphorylation, strong intramolecular phosphorylation                                                                                                                                                                                                |
| <i>QKI</i>   | -5      | N/A     | Nucleus                            | Not found                         | Inhibits cell proliferation and migration (regulates splicing of NUMB exon 12, competes with SF1 at branchpoint)(ADD3 exon 14, binds 3' region of intron 13). Inhibits miRNA transcription and transportation. Highest during embryogenesis and declines with age. |
|              | -6      | N/A     | Cytoplasm/Nucleus (Shuttle)        | Not found                         | Inhibits miRNA transcription and transportation. Expression during late embryogenesis and peak                                                                                                                                                                     |

|              |                  |       |                             |                                              |                                                                                                                                                                                                                                                                                        |
|--------------|------------------|-------|-----------------------------|----------------------------------------------|----------------------------------------------------------------------------------------------------------------------------------------------------------------------------------------------------------------------------------------------------------------------------------------|
|              |                  |       |                             |                                              | coincides with myelination in mouse brain. Positive regulators of oligodendrocyte and Schwann cell differentiation, myelin production.                                                                                                                                                 |
|              | -7               | N/A   | Cytoplasm                   | Not found                                    | Expression during late embryogenesis and peak coincides with myelination in mouse brain. Positive regulators of oligodendrocyte and Schwann cell differentiation, myelin production.                                                                                                   |
| <b>NTRK2</b> | A (trkB-fl)      | Long  | Neurons                     | Brain                                        | Transmembrane protein, BDNF binding signals PI-3K and MAP kinases. Promotes neurogenesis                                                                                                                                                                                               |
| <b>NTRK3</b> | $\beta$ (trkB-t) | Short | Astrocytes                  | Brain                                        | Transmembrane protein, highly expressed during neurogenesis to gliogenesis transition, directs differentiation into glial cells. Can antagonize effects of BDNF on neuronal survival, modulate neurite outgrowth, and activate calcium signaling pathways. Highly expressed in gliomas |
| <b>ROBO</b>  | 1                | N/A   | Not found                   | Embryonic tissues, brain/eye/kidney in adult | Transmembrane protein, interacts with extracellular SLIT. Higher expression in neurons, expressed by most pioneer axons. Associated with spatial regulation in nervous system.                                                                                                         |
|              | DUTT1            | N/A   | Not found                   | Ubiquitous                                   | More highly expressed in development. Transmembrane protein, interacts with extracellular SLIT. Main form expressed in spinal cord commissural neurons. Associated with lung development and tumorigenesis                                                                             |
| <b>ROBO3</b> | A                | N/A   | Not found                   | Several, high in Brain                       | Incapable of binding Slit, regulated through PI3-kinase. Might have significant role in the brain. Expressed in commissural neurons, suppresses Slit-mediated repulsion                                                                                                                |
|              | B                | N/A   | Not found                   | Not found                                    | Binds the ROBO ligand Slit, regulated by serin/threonine protein kinase. Upregulated in RAS and melanoma.                                                                                                                                                                              |
| <b>LIMK2</b> | A                | Long  | Cytoplasm/Nucleus (Shuttle) | Thymus, spleen, liver, intestine (preferred) | Modulated G2/M arrest. Role in microtubule organization. Phosphorylate cofilin, including leading to remodeling actin cytoskeleton during neuronal differentiation.                                                                                                                    |
|              | B                | Short | Cytoplasm predominantly     | Brain, lung, heart, kidney, testis           | Upregulated by P53, modulated G2/M arrest. Role in microtubule                                                                                                                                                                                                                         |

|               |        |       |                   |                           |                                                                                                                          |
|---------------|--------|-------|-------------------|---------------------------|--------------------------------------------------------------------------------------------------------------------------|
|               |        |       |                   |                           | organization. Phosphorylate cofilin, including leading to remodeling actin cytoskeleton during neuronal differentiation. |
| <b>AGAP2</b>  | PIKE-L | Long  | Cytoplasm/Nucleus | Brain (absent cerebellum) | Forms complex with mGluR I-Homer to activate PI 3-kinase activity and prevent neuronal apoptosis                         |
|               | PIKE-A | Short | Cytoplasm/Nucleus | Ubiquitous                | Regulates Akt/PKB activity, associated with cancer cell migration                                                        |
|               | PIKE-S | Short | Nucleus           | Brain                     | Acts as a nuclear GTPase, activates PI 3-kinase                                                                          |
| <b>RBFOX1</b> | Δ19    | Short | Nucleus           | Not found                 | Regulation of splicing networks                                                                                          |
|               | -L     | Long  | Cytoplasm         | Not found                 | 3' UTR binding and competition with other factors (like miRNAs) to stabilize synaptic and autism related genes           |

**Table S2. Alternative Start Site Isoforms.** A collection of experimentally verified isoforms with isoform designation, relative length, localization information, tissue studied, and function where found [69–72,80–81,104,186,189–192,207–209,212–229].

| Gene         | Isoform | Length | Localization      | Tissue                                       | Effect                                                                                                                                                                                                     |
|--------------|---------|--------|-------------------|----------------------------------------------|------------------------------------------------------------------------------------------------------------------------------------------------------------------------------------------------------------|
| <b>AGAP2</b> | PIKE-L  | Long   | Cytoplasm/Nucleus | Brain (absent cerebellum)                    | Forms complex with mGluR I-Homer to activate PI 3-kinase activity and prevent neuronal apoptosis                                                                                                           |
|              | PIKE-A  | Short  | Cytoplasm/Nucleus | Ubiquitous                                   | Regulates Akt/PKB activity, associated with cancer cell migration                                                                                                                                          |
|              | PIKE-S  | Short  | Nucleus           | Brain                                        | Acts as a nuclear GTPase, activates PI 3-kinase                                                                                                                                                            |
| <b>ROBO</b>  | ROBO1   | N/A    | Not found         | Embryonic tissues, brain/eye/kidney in adult | Transmembrane protein, interacts with extracellular SLIT. Higher expression in neurons, expressed by most pioneer axons. Associated with spatial regulation in nervous system.                             |
|              | DUTT1   | N/A    | Not found         | Ubiquitous                                   | More highly expressed in development. Transmembrane protein, interacts with extracellular SLIT. Main form expressed in spinal cord commissural neurons. Associated with lung development and tumorigenesis |
| <b>ROBO3</b> | ROBO3A  | N/A    | Not found         | Several, high in Brain                       | Incapable of binding Slit, regulated through PI3-kinase. Might have significant role in the brain.                                                                                                         |

|        |         |       |                           |                                         |                                                                                                                                                                                    |
|--------|---------|-------|---------------------------|-----------------------------------------|------------------------------------------------------------------------------------------------------------------------------------------------------------------------------------|
|        |         |       |                           |                                         | Expressed in commissural neurons, suppresses Slit-mediated repulsion                                                                                                               |
|        | ROBO 3B | N/A   | Not found                 | Not found                               | Binds the ROBO ligand Slit, regulated by serin/threonine protein kinase. Upregulated in RASF and melanoma.                                                                         |
| ADK    | ADK-L   | Long  | Nucleus                   | Heart/Spleen/Muscle                     | Prominent during development in brain. DNA and histone methylation. Bidirectional promoter                                                                                         |
|        | ADK-S   | Short | Cytoplasm                 | Brain                                   | Prominent in adult phase of brain development. Astrocyte adenosine flow (adenosine receptor activation).                                                                           |
| CASP-2 | L       | Long  | Cytoplasm (predominately) | Ubiquitous                              | Much stronger promoter to control ratio, overexpression induces programmed cell death, decreased expression delays apoptosis in response to various stimuli                        |
|        | S       | Short | Nucleus (predominately)   | Heart/Brain/Skeletal Muscle (contested) | Overexpression could suppress mammalian cell death, inhibits apoptotic blebbing and body formation. May bind and inhibit CASP-2L.                                                  |
| CDC6   | -L      | Long  | Not found                 | Breast                                  | Proto-oncogenic, contributes through its role in DNA replication, initiation and repressive effect on INK4/ARF locus.                                                              |
|        | -S      | Short | Not found                 | Breast                                  | Upregulation correlated with increased protein levels and BrdU incorporation. Higher translation, possible increased S phase entry.                                                |
| MYC    | 1       | Long  | Not found                 | Ubiquitous                              | Overexpression inhibits growth of COS cells. Preferred as cells approach high density growth arrest. Efficient apoptosis control                                                   |
|        | 2       | Long  | Not found                 | Ubiquitous                              | Predominant in growing cells. Competent in inducing cell growth, attenuated for apoptosis                                                                                          |
|        | S       | Short | Not found                 | Ubiquitous                              | Rescues viability and normal proliferation can't induce apoptosis.                                                                                                                 |
| FRQ    | L       | Long  | Nucleus/cytosol           | Not found                               | Ratio of both fine tune period length in response to ambient temperatures, overall levels crucial for amplitude of circadian oscillations, this isoform supports a shorter rhythm. |
|        | -S      | Short | Nucleus/cytosol           | Not found                               | Ratio of both fine tune period length in response to ambient temperatures, overall levels crucial for amplitude of circadian                                                       |

|                 |                        |       |                              |  |                |                                                                                                                                                                                                                                                                     |
|-----------------|------------------------|-------|------------------------------|--|----------------|---------------------------------------------------------------------------------------------------------------------------------------------------------------------------------------------------------------------------------------------------------------------|
|                 |                        |       |                              |  |                | oscillations, this isoform supports a longer rhythm. Splicing dependent on light/temperature                                                                                                                                                                        |
| <i>IGF-1</i>    | Ea                     | Short | Cytoplasm                    |  | Muscle         | Sustains hypertrophy and regeneration in senescent skeletal muscle. Activates additional pathways such as AMPK, able to minimize oxidative damage. Promotes satellites cell differentiation and provides most of the mature IGF-1 for stimulating protein synthesis |
|                 | Eb                     | Long  | Nuclear Fraction/ER          |  | Muscle         | Responsible for satellite cell activation and proliferation, both isoforms protect against age related muscle loss                                                                                                                                                  |
| <i>MAVS</i>     | FL MAVS                | Long  | Mitochondria/MAM/Peroxisomes |  | Ubiquitous     | Regulates production of type I IFN, STAT1                                                                                                                                                                                                                           |
|                 | miniMAVS               | Short | Mitochondria                 |  | Ubiquitous     | Suppresses production of type I IFN, STAT1                                                                                                                                                                                                                          |
| <i>MAPKAPK2</i> | Long                   | Long  | Nucleus/cytosol shuttling    |  | Not found      | Identical function (so far) to canon isoform. Role in inflammation, stress signaling, and acts as a checkpoint kinase in cancer. Appears to have different substrate specificity.                                                                                   |
|                 | Short                  | Short | Nucleus/cytosol shuttling    |  | Not found      | Induce immediate early gene early growth response 1 (EGR1), cFos, and TTP. Involved in cell migration. Associated with migration associated and transcription regulation proteins.                                                                                  |
| <i>NR3C1</i>    | hGR $\alpha$ -A        | Long  | Cytoplasm/Nucleus            |  | Ubiquitous     | High affinity to glucocorticoids, interaction with GREs following ligand activation. Regulate both common and unique sets of genes. Predominant isoform with B variant                                                                                              |
|                 | hGR $\alpha$ -B        | Short | Cytoplasm/Nucleus            |  | Liver/Thymus   | 1.5 times more effective in transactivation from a single GRE driven reporter gene than the alpha variant, transrepression remains the same. Predominant isoform with A variant                                                                                     |
|                 | hGR $\alpha$ -C1,C2,C3 | Short | Not found                    |  | Pancreas/Colon | Enhanced activity in induction of proapoptotic genes, more efficient than D isoforms at recruiting coactivators. Most sensitive variant to cell killing effects of glucocorticoids.                                                                                 |

|              |                        |       |                                |                                                               |                                                                                                                                                                                                                                       |
|--------------|------------------------|-------|--------------------------------|---------------------------------------------------------------|---------------------------------------------------------------------------------------------------------------------------------------------------------------------------------------------------------------------------------------|
|              | hGR $\alpha$ -D1,D2,D3 | Short | Nucleus                        | Spleen/Lungs                                                  | Increased expression in schizophrenia patients, low activity in induction of proapoptotic genes. Exhibit constitutive binding to certain GRE containing promoters. Most resistant variant to cell killing effects of glucocorticoids. |
| <i>NRXN1</i> | - $\alpha$             | Long  | Not found                      | Brain                                                         | Development of GABAergic synapses. Elevated expression in bipolar/schizophrenia.                                                                                                                                                      |
|              | - $\beta$              | Short | Not found                      | Brain                                                         | Selective binding of glutamatergic postsynaptic partner (Neuroigin-1, LRRTM1). Elevated expression schizophrenia.                                                                                                                     |
| <i>P53</i>   | $\Delta 40$            | Short | Not found                      | Not found                                                     | Balances tissue regeneration and tumor suppression while fine tuning p53 activity. Possible role in melanoma development.                                                                                                             |
|              | $\Delta 133$           | Short | Nucleus (predominately)        | Not detected in prostate, uterus, skeletal muscle, and breast | Inhibits p53 transcriptional activity, inhibits replicative senescence and promotes cellular proliferation of fibroblasts. Prevents p53 mediated apoptosis. Highly prone to aggregate.                                                |
|              | $\Delta 160$           | Short | Not found                      | Not found                                                     | Possible role in mutant p53 gain of function. Apoptosis inhibiting.                                                                                                                                                                   |
| <i>PTBP3</i> | FL                     | Long  | Nucleus                        | Not found                                                     | Only 10% of transcripts, regulation of FAS splicing                                                                                                                                                                                   |
|              | $\Delta 2$ AUG4        | Short | Cytoplasm/Nucleus              | Not found                                                     | Most abundant, not NMD sensitive, regulation of FAS splicing                                                                                                                                                                          |
|              | $\Delta 4$ AUG1 1      | Short | Cytoplasm/Nucleus              | Not found                                                     | Not NMD sensitive, less efficient due to poor localization, regulation of FAS splicing, RNA binding not impaired despite truncation of RRM                                                                                            |
| <i>PTEN</i>  | $\alpha$               | Long  | Mitochondria                   | Ubiquitous                                                    | Functions in mitochondrial metabolism                                                                                                                                                                                                 |
|              | $\beta$                | Long  | Nucleolus                      | Ubiquitous                                                    | Negatively regulates rDNA transcription and cellular proliferation                                                                                                                                                                    |
| <i>RUNX1</i> | b                      | Long  | Nucleus                        | Myeloid cells                                                 | More active at upregulating GM-CSF and Ialpha1 promoters.                                                                                                                                                                             |
|              | b $\Delta$ N24         | Short | Nucleus                        | Myeloid cells                                                 | Protein more stable, retains ability to promote hematopoiesis. Similar activity to inhibit growth of CB cells. Lower transcriptional activity                                                                                         |
|              | B/C                    | Short | Not found                      | Not found                                                     | Promote differentiation and abrogate engraftment of transplanted murine bone marrow cells                                                                                                                                             |
| <i>TDP2</i>  | -L                     | Long  | Mitochondria-nucleus/cytoplasm | Not found                                                     | Protect against DNA damage caused by TOP2 poison, mtDox,                                                                                                                                                                              |

|              |              |       |                        |           |                                                                                                                                                                               |
|--------------|--------------|-------|------------------------|-----------|-------------------------------------------------------------------------------------------------------------------------------------------------------------------------------|
|              |              |       |                        |           | lack of leads to reduced mitochondria transcription                                                                                                                           |
|              | -S           | Short | Mitochondria-cytoplasm | Not found | Protect against DNA damage caused by TOP2 poison, mtDox, lack of leads to reduced mitochondria transcription                                                                  |
| <b>UL138</b> | pUL13<br>8-L | Long  | Golgi/cytoplasm        | Not found | Suppress major immediate early (IE) gene transcription and generation of infectious virions in cells with HCMV. More potent at restricting virion production at early stages. |
|              | pUL13<br>8-S | Short | Golgi/cytoplasm        | Not found | Suppress major immediate early (IE) gene transcription and generation of infectious virions in cells with HCMV. More potent at restricting virion production at later stages. |

**Table S3. Alternative Polyadenylation Isoforms.** A collection of experimentally verified isoforms with isoform designation, relative length, localization, tissue studied, and function where found [94–102–104,106–107,179–180,185,202,230–238].

| Gene         | Form    | Isoform | Localization                            | Tissue         | Effect                                                                                                                                                                                                                                               |
|--------------|---------|---------|-----------------------------------------|----------------|------------------------------------------------------------------------------------------------------------------------------------------------------------------------------------------------------------------------------------------------------|
| <b>CALM1</b> | CALM1-L | Long    | Primary hippocampal processes           | Neural tissues | Absence exhibits disorganized DRG migration in embryos and reduced experience induced neuronal activation in adult hippocampus. Role in central and peripheral nervous system. Less stable than short isoform.                                       |
|              | CALM1-S | Short   | Primary hippocampal processes/DRG axons | Ubiquitous     |                                                                                                                                                                                                                                                      |
| <b>MCL1</b>  | pa1     | Short   | Mitochondria, nucleus/cytoplasm         |                | Depletion causes severe defects in mitochondria morphology, increases apoptosis, and impacts cell proliferation. Increased expression on T cell activation, correlating with increased MCL1 protein levels. Responsible for anti-apoptotic function. |
|              | pa2     | Long    | Mitochondria, nucleus/cytoplasm         |                | Depletion causes severe defects in mitochondria morphology, increases apoptosis, and impacts cell proliferation. More expressed isoform but at lower efficiency (repressed by miR17). Pro-apoptotic. May provide basal level of MCL1.                |

|              |    |       |                      |                                                  |                                                                                                                                                                                                                                                                                                                                                                                                                                     |
|--------------|----|-------|----------------------|--------------------------------------------------|-------------------------------------------------------------------------------------------------------------------------------------------------------------------------------------------------------------------------------------------------------------------------------------------------------------------------------------------------------------------------------------------------------------------------------------|
| <i>RUNX1</i> | A  | Short | Not found            | Immature hematopoietic stem and progenitor cells | Overexpression expands functional HSCs in vitro and in vivo, retards hematopoietic differentiation, and enhances engraftment of murine bone marrows cell after transplant. Overexpression associated with leukemias                                                                                                                                                                                                                 |
| <i>AAMDC</i> | -S | Short | Not found            | Not found                                        | Increased expression level and transcription efficiency. Overexpression enhanced lipid accumulation and expression of adipogenic marker genes in preadipocytes                                                                                                                                                                                                                                                                      |
|              | -W | Long  | Not found            | Not found                                        | Increased expression level and transcription efficiency at a lower level compared to the short isoform due to miRNA regulation. Overexpression enhanced lipid accumulation and expression of adipogenic marker genes in preadipocytes at a lower level than the short isoform.                                                                                                                                                      |
| <i>CDC42</i> | E6 | N/A   | Dendritic Spines     | Brain                                            | Prenylated and palmitoylated. Plays a role in dendritic spine formation, role in developing neural tube                                                                                                                                                                                                                                                                                                                             |
|              | E7 | N/A   | Axon compartment     | All                                              | Prenylated. Stimulates axon specification in dose dependent manner, role in developing neural tube                                                                                                                                                                                                                                                                                                                                  |
| <i>IRF5</i>  | V1 | Short | Not found            | Not found                                        | Constitutively active, further stimulated in virus infected cells                                                                                                                                                                                                                                                                                                                                                                   |
| <i>EEF1A</i> | 1  | N/A   | Dendrite tips/spines | Ubiquitous                                       | Endogenous were upregulated by type I lfn, V3 promoter responds to lfn. Overall higher expression than A2 variant in dendrites, might coordinate remodeling of neuronal cytoskeleton. Higher affinity for GTP and eEF1B.                                                                                                                                                                                                            |
|              | 2  | N/A   | Soma                 | Brain, heart, skeletal muscle                    | When upregulated, takes over protein synthesis in specific tissues for EEF1A1. Stimulate phospholipid signaling and activates AKT-dependent cell migration and actin remodeling. Favors oncogenesis. Expression increases over neurodevelopment. Capacity for co-translational targeting of nascent peptides for degradation under stress conditions. Balances actin bundling and local translation elongating in dendritic spines. |

|               |        |       |                                                   |                 |                                                                                                                                                                                                                                                                                                                  |
|---------------|--------|-------|---------------------------------------------------|-----------------|------------------------------------------------------------------------------------------------------------------------------------------------------------------------------------------------------------------------------------------------------------------------------------------------------------------|
| <i>DNMT3A</i> | 1      | Long  | Embryonic stem cells, bivalent CpG island shores. |                 | Responsible for maintaining methylcytosine turnover at bivalent CpG islands. Preferential localization to sites enriched for H3K27me3. De novo methylation.                                                                                                                                                      |
|               | 2      | Short | Euchromatin                                       | Not found       | Localization to actively transcribed genes enhanced by H3K36me3. Mainly expressed in early development.                                                                                                                                                                                                          |
| <i>MEMO1</i>  | -Long  | Long  | Not found                                         | Cerebellum      | Becomes primary form during differentiation, long UTR acts as dock for miR-124, downregulating expression during granule cell differentiation                                                                                                                                                                    |
|               | -Short | Short | Not found                                         | Cerebellum      | Granule cell precursors only express this short form.                                                                                                                                                                                                                                                            |
| <i>DSCAM1</i> | -L     | Long  | Not found                                         | Brain (Neurons) | Elav promotes this isoform. Knockdown results in severely compromised locomotion and adult lethality. Severely impaired mushroom bud bifurcation and suppressed axon outgrowth of small ventral lateral neurons. Preferentially excludes exon 19 (regulated by Elav). Found in late but not early-stage embryos. |
|               | -S     | Short | Not found                                         | Not found       | Expressed throughout development, not regulated by Elav.                                                                                                                                                                                                                                                         |
| <i>CCND1</i>  | A      | Short | Nucleus/Cytoplasm in S phase                      |                 | Can accelerate cell cycle and promote cell proliferation, more stable than CCND1b (conflicting evidence), increased expression                                                                                                                                                                                   |
|               | B      | Long  | Nucleus                                           | Not found       | Can accelerate cell cycle and promote cell proliferation, knockdown promotes apoptosis and suppressed cancer-cell stemness and epithelial mesenchymal transition in human bladder cancer cells.                                                                                                                  |
| <i>NET1</i>   | Long   | Long  | Nucleus((more stringently)/Cytoplasm              | Not found       | Stimulate RhoA activation and actin cytoskeletal rearrangement. Stimulated by Rac1. Preferentially stimulated by estrogen.                                                                                                                                                                                       |
|               | Short  | Short | Nucleus/Cytoplasm                                 | Not found       | Stimulate RhoA activation and actin cytoskeletal rearrangement. Stimulated by Rac1 heavily to plasma membrane. Significantly promotes gastric cell migration and invasion compared to the long isoform, promotes transcriptional                                                                                 |

|              |       |       |                  |            |                                                                                                                                                                                                                                                                                                     |
|--------------|-------|-------|------------------|------------|-----------------------------------------------------------------------------------------------------------------------------------------------------------------------------------------------------------------------------------------------------------------------------------------------------|
|              |       |       |                  |            | activity of reporter gene. Required for proper cell spreading.                                                                                                                                                                                                                                      |
| <i>IMPA1</i> | L     | Long  | Distal Axons     | Not found  | Enriched in distal axons, regulated NGF dependent pathways, involved in survival of sympathetic neuron axons. Suggested main role of providing inositol for recycling of membrane phosphoinositides.                                                                                                |
|              | S     | Short | Proximal Axons   | Brain      | Enriched in proximal axons                                                                                                                                                                                                                                                                          |
|              | C     | Short | Axons            | Brain      | Located only in axons, L form cleaved to C form in axons by Hud/Ago2, as efficient as L form at promoting axon integrity                                                                                                                                                                            |
| <i>BDNF</i>  | Long  | Long  | Dendrites/Somata | Brain      | Long UTR sufficient to target to dendrites, translated locally. Cis-acting translation suppressor at rest. Governs normal dendritic spine development and long-term potentiation. Activity dependent rapid translation from a reporter mRNA in cultured hippocampal neurons.                        |
|              | Short | Short | Somata           | Brain      | Mediates active translation to maintain basal levels of BDNF protein-translating polyribosomes in the hippocampus                                                                                                                                                                                   |
| <i>CD47</i>  | Long  | Long  | Cell Surface     | Ubiquitous | Long UTR provides many binding points for HuR RNA binding protein, which has been shown to localize CD47 to the plasma membrane through SET and active RAC1. Cells with high surface levels of CD47 are fully protected from macrophages. This isoform does not affect loss of apoptosis phenotype. |
|              | Short | Short | ER/Cell surface  | Ubiquitous | Translocated to ER. Increased susceptibility to macrophage-mediated phagocytosis.                                                                                                                                                                                                                   |
| <i>NCAM</i>  | 120   | Short | Ganglion         | Brain      | Lacks intracellular domain and is attached to the cell via a GPI linkage, most adhesive form. Expression appears to repress metastasis. High expression in ganglion, differentiated neuroblastic tumors.                                                                                            |
